# Supplementary material for: Measurement of the α1-proteinase inhibitor (α1-antitrypsin) of common marmoset and intestinal protein loss in wasting syndrome
Source: PubMed Central journal article supplement (PMC6614574; doi:10.1042/bsr20190562), 2019-07-08
Supplement: bsr20190562_Supp1.pdf [file bsr20190562_Supp1.pdf]

## Supplementary material

### Supplementary Figure

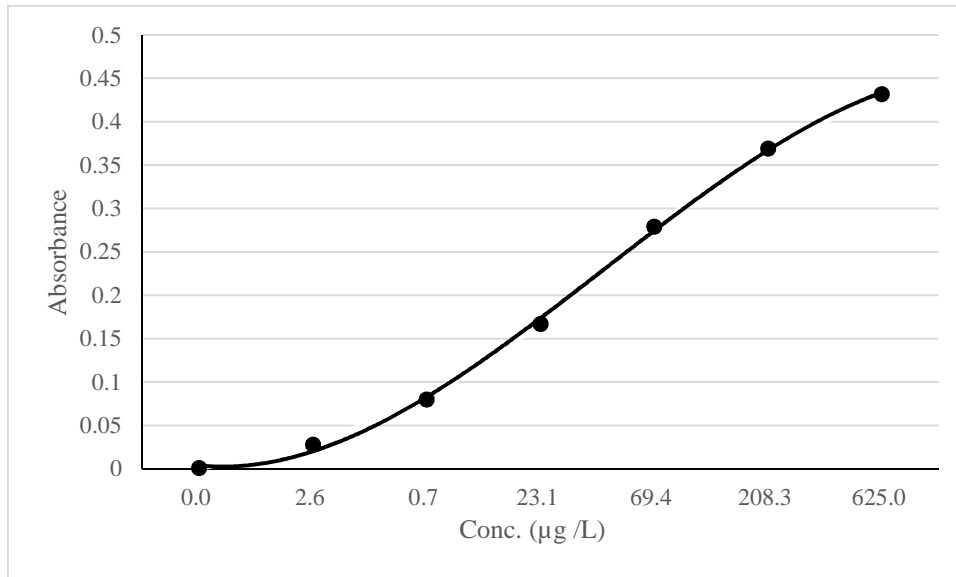

**Fig. S1 Representative standard curve for marmoset  $\alpha 1$ -PI ELISA.**

A typical standard curve for the marmoset  $\alpha 1$ -PI ELISA is shown.
